# **Comparative analysis of intracellular and extracellular antibiotic resistance gene abundance in anaerobic membrane bioreactor effluent**

**Phillip Wang\***, **Moustapha Harb\***, **Ali Zarei-Baygi\***, **Lauren B. Stadler\*\***, and **Adam L. Smith\*†**

\*Astani Department of Civil and Environmental Engineering, University of Southern California, 3620 S Vermont Ave, Los Angeles, CA 90089, USA

\*\* Department of Civil and Environmental Engineering, Rice University, 6100 Main Street, Houston, TX 77005, USA

†Corresponding author (Adam L. Smith)

Phone: +1 213.740.0473

Email: [smithada@usc.edu](mailto:smithada@usc.edu)

# Comparative analysis of intracellular and extracellular antibiotic resistance gene abundance in anaerobic membrane bioreactor effluent

Phillip Wang\*, Moustapha Harb\*, Ali Zarei-Baygi\*, Lauren B. Stadler\*\*, and Adam L. Smith\*†

\*Astani Department of Civil and Environmental Engineering, University of Southern California, 3620 S Vermont Ave, Los Angeles, CA 90089, USA

\*\* Department of Civil and Environmental Engineering, Rice University, 6100 Main Street, Houston, TX 77005, USA

†Corresponding author (Adam L. Smith)  
Phone: +1 213.740.0473

**Abstract:** The growing practice of wastewater reuse poses a significant risk to further dissemination of antibiotic resistance due to the abundance of antibiotic resistance bacteria (ARB) and antibiotic resistance genes (ARGs) in wastewater effluents. Anaerobic membrane bioreactors (AnMBRs) are an emerging wastewater treatment technology capable of reducing the total ARGs and ARB load discharged to receiving environments compared to conventional aerobic treatment processes. While size exclusion is effective at retaining ARB and its associated intracellular ARGs, the abundance and fate of extracellular ARGs in an AnMBR effluent have not been examined. This study elucidates the effect of combined antibiotics loading (ampicillin, erythromycin, and sulfamethoxazole) on the abundance of intracellular and extracellular ARGs in an AnMBR effluent over a period of five weeks. Quantification of targeted genes revealed an overall enrichment of intracellular ARGs (iARGs) and depletion of extracellular (exARGs) in response to antibiotics addition, which suggests exARG uptake as a significant mode of horizontal gene transfer in AnMBR effluents. Comparison of the iARG and exARG abundance profiles showed a potential bias for exARG uptake located on

28 small plasmids compared to large plasmids.

29

30 **Importance:** Antibiotic resistance dissemination is facilitated through horizontal gene  
31 transfer (HGT) of ARGs. Currently, conjugation is considered to be the dominant  
32 mechanism during wastewater treatment. However, recent studies have detected high  
33 abundances of exARGs , implying that transformation may play a greater role in  
34 dissemination. While previous studies quantified iARGs and exARGs in wastewater  
35 treatment facilities, they did not evaluate temporal changes between the two forms.  
36 Further, almost no research has differentiated between iARGs and exARGs in anaerobic  
37 processes, which are being considered to replace aerobic activated sludge processes.  
38 This study specifically investigates the abundance of targeted iARGs and exARGs in  
39 AnMBRs in response to antibiotic pressure to quantify potential exchange of ARGs  
40 between intracellular and extracellular compartments. Our findings suggest that exARGs  
41 located on small plasmids are preferentially taken up by cells under antibiotic pressure  
42 compared to large plasmids, which implies heterogenous HGT mechanisms among the  
43 plasmid community.

## 44 1. Introduction

45 The global spread of antibiotic resistance continues to be a grave threat to human  
46 health (Chioro, et al., 2015). Approximately 2 million clinical cases and 23,000 deaths  
47 related to antibiotic resistant infections occur annually in the US (Frieden, 2013). Current  
48 projections estimate that the yearly worldwide deaths related to antibiotic resistance will  
49 reach 10 million by the year 2050 (O'Neil, 2014). While conventional wastewater  
50 treatment plants (WWTPs) are effective at managing organics and nutrients, they are not  
51 designed or operated to treat emerging contaminants like antibiotic resistance genes  
52 (ARGs) and antibiotic resistant bacteria (ARB). With growing awareness of antibiotic  
53 resistance, numerous studies have identified WWTPs as hot spots for the propagation of  
54 ARGs and ARB (Bouki, et al., 2013, Michael, et al., 2013). Studies on the effluent quality  
55 of conventional WWTPs have reported incomplete removal of both ARGs and ARB  
56 (McConnell, et al., 2018, Quach-Cu, et al., 2018). Therefore, ARGs and ARB in treated  
57 wastewater can continue to proliferate via horizontal gene transfer (HGT) and vertical  
58 gene transfer when discharged into receiving environments.

59 Analyses of sediment microbial communities near outfall sites of WWTPs have  
60 detected similar patterns of ARGs and gene classes as those in WWTP effluents (Chu,  
61 et al., 2018). While the influence of effluent ARGs on the sediment microbial community  
62 is less prominent with increasing distance from effluent outfall sites, the practice of water  
63 reuse (e.g., for agricultural irrigation), removes the environmental buffers associated with  
64 conventional handling of treated wastewater and results in direct ARGs and ARB loading  
65 to receiving soils. Observations of recent studies generally suggest a positive association

66 between proliferation of soil ARGs and contact time with treated wastewater (Fahrenfeld,  
67 et al., 2013, Han, et al., 2016, Corno, et al., 2019). Therefore, reducing the abundance of  
68 antibiotic resistance elements in treated wastewater is critical to limiting the spread of  
69 antibiotic resistance in water reuse applications (Pruden, et al., 2013).

70 Anaerobic membrane bioreactors (AnMBRs) are an emerging wastewater  
71 treatment technology that couples anaerobic biological treatment with membrane  
72 separation to recover energy, reduce sludge production, and produce a high-quality  
73 effluent comparable to activated sludge processes (Smith, et al., 2012). Although low in  
74 carbon, AnMBR effluents are rich in nutrients and can be utilized effectively in agricultural  
75 reuse scenarios to offset artificial fertilizer needs. Further, the combination of membrane  
76 separation with slower microbial growth under anaerobic conditions can theoretically  
77 reduce the load of ARGs and ARB in treated wastewater (Le, et al., 2018). However, the  
78 fate of ARGs and ARB within AnMBRs remains poorly understood. Previously, we  
79 reported the first long-term investigation of eight ARGs, spanning multiple ARG subtypes,  
80 in a bench-scale AnMBR under step-wise increases in influent antibiotic concentrations  
81 (Zarei-Baygi, et al., 2019). Our results revealed stark differences in the ARG abundance  
82 profile of the biomass versus effluent under all conditions tested. The steep reduction in  
83 the ARG abundance profile from the biomass to the effluent is likely due to the effective  
84 microbial retention by the submerged membranes (Li, et al., 2019). However, size  
85 exclusion by membrane pores may not retain extracellular ARGs (exARGs). Moreover, a  
86 growing number of studies have reported a high abundance of extracellular DNA (exDNA)  
87 in WWTPs and have suggested that the transformation of exARGs might play a larger  
88 role in antibiotic resistance dissemination than previously considered (Mao, et al., 2014,

89 Dong, et al., 2019). Therefore, we suspect that the ARG profile in AnMBR effluent may  
90 be heavily influenced by exARGs passing through the membrane pores.

91 Of concern to human health are the many human pathogens known to enter  
92 natural competency (e.g., *Campylobacter*, *Haemophilus*, *Helicobacter*, *Neisseria*,  
93 *Pseudomonas*, *Staphylococcus*, *Streptococcus*, *Vibrio*), with some pathogenic strains  
94 having a subset of their clonal population in a state of constitutive competency (e.g.,  
95 *Neisseria gonorrhoea* and *Helicobacter pylori*). While the transformation of exDNA may be  
96 limited to smaller plasmids and not be effective at disseminating large multi-drug resistant  
97 plasmids, smaller non-conjugative plasmids can also confer multi-drug resistance in  
98 bacteria (San Millan, et al., 2009, Lean and Yeo, 2017). Therefore, the direct loading of  
99 exARGs, iARGs, and ARB to areas of potential human contact could significantly  
100 accelerate the development of antibiotic resistant human pathogens.

101 Previous studies on exARGs and iARGs have focused on investigating their  
102 abundance at multiple environmental locations, such as various types of WWTPs, water  
103 sources, and sediments (Mao, et al., 2014, Wang, et al., 2016, Zhang, et al., 2018, Dong,  
104 et al., 2019). However, no studies to date have examined the effect of antibiotics addition  
105 on exARG and iARG abundance over time. The dynamic relationship between exARGs  
106 and iARGs within a microbial community in antibiotic-influenced environments remains  
107 an area of much needed investigation. The potential cyclical movement of exDNA  
108 between microbial hosts and the extracellular compartment may be a fundamental  
109 mechanism for the conservation and propagation of ARGs and ARG associated MGEs  
110 between distinct and distant microbial communities. While AnMBRs could theoretically

111 lessen the load of ARGs and ARB to receiving environments compared to conventional  
112 treatment process, the potential propagation of exARGs in the effluent stream needs  
113 further research. In this study, we characterized the effect of a combined mixture of  
114 antibiotics loading on the antibiotic resistance characteristics of an AnMBR effluent  
115 stream.

## 116 2. Materials and Methods

### 117 2.1 *AnMBR Configuration and Monitoring*

118 A bench-scale AnMBR with a working volume of 5 L was operated at 25 °C as  
119 previously described (Zarei-Baygi, et al., 2019). Briefly, the AnMBR housed three  
120 separate submerged flat-sheet silicon carbide microfiltration membranes (0.1 µm pore  
121 size, Cembrane, Denmark), with a total effective membrane area of approximately 0.015  
122 m<sup>2</sup>. Synthetic wastewater was used to reduce the variable background influence of  
123 antibiotics, ARB, and ARGs associated with real wastewater. The synthetic wastewater  
124 recipe was formulated to represent US domestic wastewater (Supporting Information (SI)  
125 Table S1) (Smith, et al., 2013). The AnMBR was seeded with sludge from a mesophilic  
126 anaerobic digester at the Joint Water Pollution Control Plant (Carson, CA). AnMBR  
127 performance was monitored by measuring water quality parameters including soluble  
128 chemical oxygen demand (sCOD), total chemical oxygen demand (tCOD), volatile fatty  
129 acids (VFAs), and mixed liquor and volatile suspended solids (MLSS/MLVSS). Biogas  
130 production was monitored by an in-line gas flowmeter and assessed for methane content  
131 by gas chromatography with flame ionization detection (GC-FID). Steady AnMBR  
132 performance was defined as low effluent COD (<50 mg/L), stable biogas production, and

133 high methane content (>60%) over a phase of 10 days. After reaching steady AnMBR  
134 performance, three antibiotics, sulfamethoxazole (sulfonamide), erythromycin  
135 (macrolide), and ampicillin ( $\beta$ -lactam), were added to the influent at 250  $\mu\text{g/L}$  (day 3) to  
136 represent antibiotic concentrations at the high range of hospital wastewater (Xu, et al.,  
137 2016, Kulkarni, et al., 2017). Influent antibiotics concentration was maintained at 250  $\mu\text{g/L}$   
138 for the entirety of the antibiotics loading phase (day 3 to day 35). Effluent lines were  
139 cleaned with sodium hypochlorite 0.5% (v/v) before the start of the experiment.  
140 Membrane modules were removed for physical and chemical cleaning 0.5% (v/v) before  
141 the addition of antibiotics.

## 142 2.2 Antibiotic Quantification

143 Antibiotic quantification procedures were carried out as previously described  
144 (Zarei-Baygi, et al., 2019). Briefly, individual antibiotic concentrations of each sample  
145 were analyzed by direct injection liquid chromatography mass spectrometry with  
146 electrospray ionization (LC-ESI-MS) on a 6560 Ion Mobility Quadrupole Time-of-Flight  
147 (IM-QTOF) LC-MS system (Agilent). Chromatographic separation and ionization were  
148 achieved by employing a 1290 Infinity UHPLC with EclipsePlus C18 column (2.1 mm; 50  
149 mm; 1.8 $\mu\text{m}$ ) followed by a Dual Agilent Jet Stream (ASJ) ESI. Standard curves were  
150 generated by matrix-matched external calibration of serial dilutions of antibiotics  
151 purchased from Sigma (>99% purity). Practical quantitation limits (PQL) for each target  
152 compound were determined to be <0.1  $\mu\text{g/L}$  based on previously optimized LC-ESI-MS  
153 conditions (Zarei-Baygi, et al., 2019). Details on sample preparation, optimized LC  
154 program, and MS operational conditions can be found in the (SI Table 3).



## 155           2.3    *qPCR quantification of ARGs*

156           qPCR reactions were carried out using a LightCycler 96 (Roche, Basel,  
157 Switzerland) targeting a set of nine genes. The nine targeted genes included: a class one  
158 integrase gene (*intl1*), a single copy per cell gene (*rpoB*), and seven ARGs conferring  
159 resistance to  $\beta$ -lactams (*oxa-1* and *ampC*), macrolides (*ermF*), sulfonamides (*sul1* and  
160 *sul2*), and tetracyclines (*tetW* and *tetO*). Targeted ARGs were chosen based on their  
161 common detection in domestic wastewater studies (Pruden, et al., 2006, Ma, et al., 2011,  
162 Munir, et al., 2011). qPCR reactions were done in 20  $\mu$ L reactions with 10  $\mu$ L of qPCR  
163 master mix (Forget-Me-Not EvaGreen, Biotium, Fermont, CA), forward and reverse  
164 primers at 0.25  $\mu$ M (final concentration) each, 1  $\mu$ L of DNA template, and ddiH<sub>2</sub>O. Each  
165 reaction was performed in triplicate. Details for the thermal cycling conditions for all  
166 targeted ARGs are provided in the (SI Table 2). All qPCR results were normalized to  
167 effluent sample volume for comparison of ARG abundance across sampling points.  
168 Results were represented as total abundance instead of normalized values relative to  
169 chromosomal *rpoB* gene due to previous reports of faster decay rates for chromosomal  
170 DNA versus plasmid DNA, which could lead to inflated reports of exARG concentration  
171 when normalizing to chromosomal genetic markers (Mao, et al., 2014).

## 172           2.4    *Intracellular and extracellular DNA extraction*

173           iDNA and exDNA extractions were carried out using the same 500 mL effluent  
174 samples for each sampling point. Internal standards to correct for DNA recovery across  
175 sample processing were added to each effluent sample by spiking with approximately  
176  $2 \times 10^6$  copies of plasmid pUC19 immediately after collection. Spiked effluent samples

177 were filtered using vacuum filtration through sterile cellulose acetate membrane filters  
178 (0.22 $\mu$ m, 45mm diameter, Whatman). Processed filters with collected biomass were used  
179 for iDNA extractions. The processed filters were cut into pieces and placed in 2 mL sterile  
180 tubes and mixed with lysis buffer before bead beating with zirconium beads. iDNA  
181 extractions were carried out using the Maxwell 16 instrument (Promega) and eluted in  
182 100 $\mu$ l of buffer AE. The filtrates were used for exDNA extractions using nucleic acid  
183 adsorption particles (NAAP) adapted from Wang et al (Wang, et al., 2016). Briefly,  
184 autoclaved Al(OH)<sub>3</sub> solutions (47.8%, V/V) were mixed with 5% (g/mL) silica gel (60-100  
185 mesh size, Sigma) and dried for 36 hours at 60°C. Dried silica gels coated with Al(OH)<sub>3</sub>  
186 were then sealed in a cylindrical glass container (1.5 x 40 cm) as NAAP columns. The  
187 previously mentioned filtrate samples were passed through the NAAP columns. Adsorbed  
188 exDNA were eluted from the NAAP columns with 100 mL of elution buffer (15 g/L NaCl,  
189 30 g/L tryptone, 15 g/L beef extract, 3.75 g/L glycine, 0.28 g/L NaOH, pH of 9.3  $\pm$  0.2).  
190 Eluates were then collected and filtered with polyethersulfone filters (0.22  $\mu$ m, Millipore,  
191 USA). ExDNA in the filtrates were precipitated using an equal volume of isopropanol,  
192 incubated at room temperature for 16 h, and centrifuged at 10,000g for 10 min at room  
193 temperature. After decantation of the supernatant, the centrifuged pellets were mixed with  
194 70% ethanol (v/v) and centrifuged again at 10,000 g for 5 min at room temperature. After  
195 a second decantation, the residual ethanol was evaporated in a 60 °C oven and the pellets  
196 were re-suspended in 4 mL of sterilized TE buffer. Extracted DNA samples were  
197 quantified using Quant-iT PicoGreen (Thermo Fisher) and a BioSpectrometer  
198 (Eppendorf, Hamburg, Germany). iDNA extraction efficiency was carried out without the  
199 use of an iDNA internal standard due to the consistent performance of the Maxwell 16

200 instrument (Promega) (data not shown). Extraction efficiency of each exDNA extraction  
201 was assessed using spiked pUC19 serving as the exDNA standard (SI Table 2). The  
202 qPCR results for each exARG data point were adjusted based on the corresponding  
203 extraction efficiency of the exDNA standard (e.g., gene copies of exampC/(gene copies  
204 of pUC19/total spiked gene copies of pUC19)). All DNA extracts were stored at -80 °C  
205 until analysis.

## 206           2.5    *Statistical Analysis Methods*

207           Statistical analyses were performed using MaxStat Lite 3.6. Significant changes in  
208 ARG abundance at different time points were assessed using a 2-tailed unpaired  
209 student's t-test. Pearson and Spearman rank correlations were used to assess  
210 correlations between data points over a 95% confidence interval. Strength of correlations  
211 were identified based on the Pearson coefficient  $r$ , as  $r > 0.7$  or  $r < -0.7$  for strong  
212 correlations,  $-0.7 < r < -0.5$  or  $0.5 < r < 0.7$  for moderate correlations, and  $-0.5 < r < -0.3$  or  
213  $0.3 < r < 0.5$  for weak correlations. Pearson correlations were performed on separated  
214 iARG and exARG data sets. Spearman rank correlations were performed on the  
215 combined iARG and exARG data sets due to the dynamic nature of gene transport,  
216 synthesis, and degradation.

## 217           2.6    *Heterotrophic Plate Counts*

218           Total bacteria and ARB in the effluent were enumerated using the heterotrophic  
219 plate count method with nutrient agar as the media (Federation, 2005). Ampicillin (AMP),  
220 tetracycline (TET), erythromycin (ERY), and sulfamethoxazole (SMX) resistant bacteria

221 counts were determined by growth on nutrient agar plates supplemented with  
222 corresponding AMP, TET, SMX, or ERY. TET resistance bacteria counts were included  
223 as a control given the lack of tetracycline in the synthetic wastewater. Final concentration  
224 for each antibiotic was guided by MIC reports in previous studies: AMP, 16 µg/mL; TET,  
225 16 µg/mL; ERY, 50.4 µg/mL; and SMX, 18.1 µg/mL (Pei, et al., 2006, Zheng, et al., 2017).  
226 All plates were incubated at 35°C for 48 hrs.

### 227 3. Results and Discussion

#### 228 3.1 Stable Reactor Performance Under Mixed Antibiotics Loading

229 Effluent COD averaged  $45.4 \pm 10.7$  mg/L, equating to a COD removal of  $90.0 \pm$   
230 1.8% throughout the experimental phase. Average biogas production and methane  
231 content were  $736 \pm 20$  mL/d and  $536 \pm 14$  mL/d, respectively. The average MLSS and  
232 MLVSS were  $10.6$  g/L  $\pm 1.3$  and  $9.6 \pm 0.3$  g/L, respectively. The addition of mixed  
233 antibiotics (SMX, ERY, and AMP), at 250 µg/L each, to the influent showed minimal  
234 perturbation to the reactor performance (SI Fig1), except for day 17 which saw a slight  
235 decrease in biogas production. These results are consistent with previous studies which  
236 have shown that this range of antibiotic loading on anaerobic reactors is well below the  
237 threshold that would cause a disruption in system performance (Aydin, et al., 2015, Xiong,  
238 et al., 2017). Antibiotic removal was relatively stable across the operational phase, with  
239 AMP removal ranging from 89-98%, followed by SMX at 69-78%, and ERY at 40-58%  
240 (Fig 1). The wide-ranging specific removal rates of these antibiotics in the AnMBR are  
241 consistent with those observed for other mainstream anaerobic wastewater treatment

242 systems, which can vary greatly in comparison to conventional aerobic treatment  
243 schemes (Harb, et al., 2019).

### 244 *3.2 SMX Resistant Bacteria Count Approaches Total Culturable Bacteria Count*

245 Overall, SMX resistance showed the greatest degree of proliferation among the  
246 types of antibiotic resistance tested. SMX resistant bacteria in the effluent increased by >  
247 3 log (CFU/mL) ( $p=0.032$ ) over the course of the experiment, with the number of total  
248 bacteria increasing by 0.68 log (CFU/mL) ( $p=0.027$ ) over the same duration (Fig 2). The  
249 ratio of SMX resistant bacteria to total bacteria exhibited a non-linear rise from 55.5%  
250 (day 1) to 96.5% (day 57). In comparison, the ratio of AMP resistant bacteria to total  
251 bacteria rose from 68.7% to 75.4% and the ratio of ERY resistant bacteria to total bacteria  
252 fell from 89.3% to 76.7%. As expected, (given no addition of TET in the influent) counts  
253 for TET resistant bacteria frequently fell below the limit of detection (LOD= 10 CFU/mL).  
254 Among the ARB types tested, only SMX resistant bacteria showed a positive association  
255 between the increase in effluent abundance and antibiotic dosing. Our findings were  
256 consistent with our previous report and Le et al., where sulfamethoxazole was found to  
257 be one of three antibiotics to increase with its corresponding ARB among 19 targeted  
258 antibiotics in an MBR system (Le, et al., 2018, Zarei-Baygi, et al., 2019). It is important to  
259 note that heterotrophic plate counts only capture a small fraction of microbial diversity.  
260 Further, aerobic plating of effluents from anaerobic systems favors quantification of  
261 facultative microorganisms and excludes detection of obligate anaerobes. Despite these  
262 methodological limitations, HPC used in this capacity still provides useful data regarding

263 relative changes in ARB, which complements our parallel use of culture-independent  
264 methods (i.e., qPCR).

265

### 266 *3.3 Total iARGs and exARGs Showed Varied Response Towards Antibiotics* 267 *Addition*

268 Total iARGs were consistently more abundant than total exARGs by at least 2 log  
269 (Gene Copies/mL) throughout the experimental period (Fig 3). Similar findings of higher  
270 iARG versus exARG abundance have been reported in most aquatic environments  
271 examined (Nielsen, et al., 2007, Mao, et al., 2014, Zhang, et al., 2018, Hao, et al., 2019).  
272 In contrast, studies on sediment samples frequently report higher abundance of exARGs  
273 than iARGs (Mao, et al., 2014, Dong, et al., 2019). The higher abundance of exARGs  
274 versus iARGs in sediment samples is likely due to the adsorption of exDNA to soil colloids,  
275 clay particles, and organic matter that can decrease the susceptibility of exDNA  
276 degradation from nuclease attacks (Crecchio and Stotzky, 1998, Demanèche, et al.,  
277 2001).

278 The addition of antibiotics in the influent coincided with increasing abundance of  
279 total iARGs in AnMBR effluent, rising from 5.52 (day 1) to 7.13 (day 35) log (Gene  
280 Copies/ml). The observed increase in total iARGs during the antibiotics loading phase is  
281 likely due to the selection for ARB and their associated ARGs in the effluent stream. The  
282 abundance of total exARGs, over the same time frame, exhibited a non-linear decrease  
283 from 3.46 (day 1) to 3.16 (day 35). Interestingly, total exARGs showed an initial rise to  
284 4.2 log (gene copeies/mL) (day 21) followed by a precipitous drop to 2.11 log (Gene

285 Copies/ml) midway through the experimental run (day 28). The initial increase in total  
286 exARGs before day 28 could be due to antibiotic induced exDNA release for the purpose  
287 of biofilm formation and HGT (Zafra, et al., 2012, Okshevsky and Meyer, 2015, Sugimoto,  
288 et al., 2018). Moreover, antibiotics, biofilm formation, and exDNA are all associated with  
289 the induction of natural competency of many bacterial species (Li, et al., 2001, Ibanez de  
290 Aldecoa, et al., 2017). Therefore, an increase in competent microbial members within the  
291 effluent stream could explain the sharp decrease in total exARGs abundance on day 28.  
292 In the post-antibiotics loading phase, the increase in total exARGs is likely due to the loss  
293 of ARG-associated MGEs as the fitness advantage of retaining ARG-associated MGEs  
294 decreases. However, the persistence of MGEs in microbial hosts under antibiotic-free  
295 conditions is influenced by the surrounding genes. While low copy large plasmids typically  
296 encode for additional maintenance genes (e.g., partitioning and toxin-antitoxin systems)  
297 that promote their own survival in the absence of antibiotic pressure (Ghaly and Gillings,  
298 2018), high copy small plasmids do not encode for these maintenance genes and are  
299 generally more easily lost in the absence of strong selective pressure.

### 300 3.4 *Mixed-Antibiotics Loading Increases the Abundance of Effluent iARGs*

301 In the pre-antibiotics phase, *int1* was the most abundant target gene detected in  
302 the effluent, followed by *sul1*, *rpoB*, *sul2*, *tetO*, *tetW*, *ermF*, *oxa-1*, and *ampC* (Fig 4).  
303 During the antibiotics loading phase, the abundance of *sul2* exhibited the highest  
304 increase, rising from 4.57 to 7.08 log (Gene Copies/ml) ( $p < 0.01$ ). The abundance of *sul1*  
305 and *int1* increased from 5.9 to 6.56 log (Gene Copies/ml) ( $p = 0.168$ ) and from 5.46 to 6.21  
306 log (Gene Copies/ml) ( $p = 0.238$ ), respectively. The relatively high abundance of *sul1*, *sul2*,

307 and *int1* among targeted ARGs in our study is consistent with previous reports (Rowe, et  
308 al., 2016, Xu, et al., 2016, Zarei-Baygi, et al., 2019). Interestingly, the abundance of *oxa*-  
309 1 rose from 2.39 to 3.58 log (Gene Copies/ml) ( $p < 0.01$ ), while the abundance of *ampC*  
310 decreased from 1.16 to 0.9 log (Gene Copies/ml) ( $p=0.02$ ). The preferential selection of  
311 *oxa*-1 over *ampC* could be due to the co-localization of *oxa*-1 and *sul2* on the same MGE,  
312 which would allow for the co-selection of *oxa*-1 from the SMX addition. This hypothesis is  
313 supported by the strong correlation between *sul2* and *oxa*-1 ( $r= 0.772$ ) ( $p<0.01$ ) and the  
314 low AMP (2.8  $\mu\text{g/L}$  to 22.45  $\mu\text{g/L}$ ) selective pressure in the effluent. Despite high ERY  
315 concentrations (107.0  $\mu\text{g/L}$  to 130.5  $\mu\text{g/L}$ ) in the effluent, *ermF* abundance showed  
316 modest increase from 2.91 to 3.86 log (Gene Copies/ml) ( $p<0.01$ ).

317 In the post-antibiotics phase, *sul2* levels significantly dropped by 2.16 log (Gene  
318 Copies/ml) ( $p<0.01$ ). Consistent with our previous co-localization hypothesis, the  
319 abundance of *oxa*-1 showed a similar sharp decrease, dropping from 3.5 to 2.08 log  
320 (Gene Copies/ml) ( $p<0.01$ ). Additional iARG decreases included *ermF*, *tetO*, and *tetW*,  
321 which declined in abundance from 3.68 to 2.72 log (Gene Copies/ml) ( $p < 0.01$ ), 3.27 to  
322 2.31 log (Gene Copies/ml) ( $p < 0.01$ ), and 3.67 to 2.86 log (Gene Copies/ml) ( $p < 0.01$ ),  
323 respectively. Surprisingly, the abundance of *sul1* and *int1* remained elevated at 6.59 and  
324 7.19 log (Gene Copies/ml), respectively. The elevated concentrations of *sul1* and *int1*  
325 genes in the post antibiotics phase may be due to the greater persistence of low copy  
326 number large plasmids compared to high copy small plasmids in microbial hosts (Carroll  
327 and Wong, 2018). On a population level, non-conjugative plasmids tend to be smaller in  
328 size and are present in higher copy numbers (up to 200 copies per cell) compared to  
329 conjugative plasmids, which tend to be much larger in size and present in lower copy



330 numbers (<10 copies per cell) (Watve, et al., 2010, Shintani, et al., 2015). Under selective  
331 pressure, high copy number plasmids could theoretically increase in abundance within a  
332 microbial community more rapidly than low copy plasmids. However, small non-  
333 conjugative plasmids typically do not encode for maintenance or stability genes and are  
334 easily lost when the selective pressure is removed. In contrast, low copy conjugative  
335 plasmids may exhibit longer persistence within a microbial community due to additional  
336 maintenance systems encoded on the plasmid backbone (e.g., partitioning and toxin-  
337 antitoxin systems) (Garcillan-Barcia, et al., 2011). Overall, *sul1* and *sul2* were the two  
338 most abundant ARGs detected and *sul2* exhibited the greatest increase under antibiotic  
339 pressure. Further, the sharp rise of *sul2* in response to antibiotic stress and the  
340 persistence of *sul1* in the post-antibiotics phase is consistent with the SMX resistant  
341 bacteria proliferation observed in our HPC results.

342         Pearson correlation analysis of the iARG data set revealed significant correlations  
343 between two sets of genes, *sul2*, *oxa-1*, and *tetO* ( $r > 0.65$ ,  $p < 0.05$ ) and *ermF*, *sul1*, and  
344 *intl1* ( $r > 0.6$ ,  $p < 0.05$ ), which suggests the presence of multi-drug resistant plasmids  
345 and/or distinct modes of plasmid propagation rates (e.g., low versus high copy plasmid).  
346 Moreover, *sul1* was strongly correlated with *intl1* ( $r = 0.869$ ,  $p < 0.01$ ), while no correlation  
347 was found between *sul2* and *intl1* ( $r = -0.059$ ,  $p = 0.853$ ), which suggests that the  
348 discrepant response of *sul1* and *sul2* to the addition of antibiotics was attributed to the  
349 different types of MGEs surrounding *sul1* and *sul2*. Consistent with this explanation,  
350 previous studies examining the characteristics of isolated plasmids harboring *sul1* and  
351 *sul2* commonly detected *sul2* on small non-conjugative plasmids whereas *sul1* was  
352 exclusively found on large conjugative plasmids (Enne, et al., 2004, Antunes, et al., 2005,

353 San Millan, et al., 2009, Wu, et al., 2010, Dominguez, et al., 2019). The strong correlation  
354 between *ermF* with *sul1* and *int1* suggest that *ermF* is either co-localized with *sul1* and  
355 *int1* or located on similar low copy number conjugative plasmids, which could explain the  
356 modest increase in abundance for *sul1*, *int1*, and *ermF* despite significant concentrations  
357 of SMX (54.9 µg/L to 75.2 µg/L) and ERY (107.0 µg/L to 130.5 µg/L) in the effluent stream.

### 358 3.5 Temporal Abundance Prolife of Effluent exARGs and iARGs Revealed 359 Distinct Patterns

360 In the pre-antibiotics phase, all exARGs were detected, ranging from 0.25 to 3.1  
361 log (Gene Copies/ml) (Fig 5). Interestingly, the addition of antibiotics coincided with an  
362 overall decrease in exARG abundance, which contrasted the enrichment of iARGs during  
363 the same period. Similar to iARGs, exARGs are likely associated with MGEs of varied  
364 sizes. The uptake of exDNA by microbial hosts has been documented to favor small  
365 plasmids and DNA fragments, which could cause the overall variability of exARG  
366 abundance (Prudhomme, et al., 2006, Slager, et al., 2014). Therefore, the size of the  
367 genetic carrier harboring exARG would influence its rate of degradation and uptake by  
368 microbial hosts.

369 Pearson correlation analysis of the exARG data set revealed distinct patterns of  
370 removal, which supports the hypothesis of size dependent exDNA uptake. Similar to the  
371 Pearson correlation analysis for iARGs, extracellular *sul1* was strongly correlated with  
372 extracellular *int1* ( $r= 0.87$ ,  $p<0.01$ ). Interestingly, extracellular *sul2* was strongly  
373 correlated with extracellular *int1* as well ( $r=0.78$   $p<0.01$ ) and was moderately correlated  
374 with extracellular *sul1* ( $r=.59$   $p<0.01$ ). While some studies have identified *sul2* to be

375 distinctly separate from *sul1* and *int11*, a few reports have detected *sul2* genes on large  
376 conjugative plasmids along with *sul1* and *int11* genes (Phuong Hoa, et al., 2008, Wu, et  
377 al., 2010, Wu, et al., 2010). The positive correlation of extracellular *sul1*, *sul2*, and *int11* in  
378 the extracellular compartment could be due to the lower uptake efficiency of large  
379 plasmids compared to small plasmids. Since *sul2* has been documented on both large  
380 and small plasmids, there could be a preferential uptake of small *sul2*-associated  
381 plasmids while leaving behind larger *sul2*-associated plasmids. From the iARG profile,  
382 intracellular *ermF*, *sul1*, and *int11* all exhibited propagation patterns resembling those of  
383 low copy number conjugative plasmids, which are generally larger than non-conjugative  
384 plasmids (Garcillan-Barcia, et al., 2011). Since exARGs are simply the cell-free form of  
385 iARGs, the greater persistence of extracellular *ermF*, *sul1* and *int11* over extracellular *sul2*,  
386 *oxa-1*, and *tetO* could be due to the lower uptake efficiency of larger plasmids compared  
387 to smaller plasmids.

388 Spearman rank correlation analysis was performed on the combined iARG and  
389 exARG data sets to further assess the temporal relationship between iARGs and exARGs.  
390 Among the ARGs examined, only extracellular *sul2* and extracellular *tetW* were negatively  
391 correlated to intracellular *sul2* ( $r=-0.68$ ,  $p<0.01$ ) and intracellular *tetW* ( $r = -0.836$ ,  $p$   
392  $<0.01$ ), respectively. The negative correlation between extracellular *sul2* and intracellular  
393 *sul2* is consistent with our hypothesis that exARGs can be taken up and enriched within  
394 microbial hosts. The lack of a significant correlation among the remaining exARGs and  
395 their intracellular counterpart could be due to additional barriers involved in acquiring and  
396 maintaining exogenous genes. As stated previously, the uptake of exDNA by microbial  
397 hosts would likely favor small plasmids and DNA fragments. Further, the maintenance of

398 exogenous genes, including ARGs, on linear DNA fragments would require recirculation  
399 or integration into the microbial host genome through homologous recombination or  
400 transposable elements. In general, non-integrated or circularized fragments would likely  
401 be degraded for metabolic purposes or released back into the environment. Therefore,  
402 the uptake of exDNA could be the first step in acquiring new functional traits and the  
403 quality and compatibility of the genetic carrier adds further selection to the maintenance  
404 of the acquired genes. Our findings add support to the hypothesis that the extracellular  
405 compartment within microbial communities can serve as a reservoir for genetic resources,  
406 including ARGs, with potential uptake biases toward small plasmids or DNA fragments.

407         While *in vitro* studies attempting to induce natural competency for many bacterial  
408 species have shown limited success, the complexities of environmental conditions are  
409 difficult to recreate in controlled laboratory conditions. Further, the induction of natural  
410 competency for some bacterial strains have been shown to rely on the production of  
411 signaling molecules from other bacterial species (Zhu, et al., 2011). In the context of  
412 wastewater reuse, treated wastewater could provide high concentrations of exARGs,  
413 environmental stressors, and signaling molecules from highly complex microbial  
414 communities that could promote a feedback loop for exDNA release, biofilm formation,  
415 and natural competency in the receiving microbial community. This cyclical uptake and  
416 release of exARGs, particularly in plasmid form, could increase the total abundance of  
417 exARGs within the extracellular matrix due to multiple replication cycles of plasmids within  
418 microbial hosts. Additional studies are needed to unravel the complex dynamics between  
419 exARG uptake and release within receiving environments such as soil microbial  
420 communities.

421           In this study, we have shown that under mixed-antibiotics loading (SMX, ERY, and  
422 AMP at 250 µg/L), SMX resistant bacteria increase from 55.5% to 96.5% of total  
423 culturable bacteria in the effluent. Complimentary qPCR analysis of iARG abundance  
424 revealed a stark increase in *sul2* and the persistence of *sul1* abundance, which is  
425 consistent with our observation of the dominance of SMX resistant bacteria in HPC  
426 results. Finally, qPCR analysis of the exARG abundance over the same duration revealed  
427 an inverse trend for most exARGs and their intracellular counterparts. Most notably,  
428 extracellular *sul2* was negatively correlated to intracellular *sul2* ( $r = -0.68$ ,  $p = 0.001$ ), which  
429 suggests that competent cells can acquire antibiotic resistance from exARGs. However,  
430 it is important to note that qPCR assays are limited to the quantification of pre-determined  
431 genes. Further, the correlations drawn in this paper would benefit from experiments  
432 directly tracking the movements of iARGs and exARGs. Future studies should use  
433 metagenomic guided qPCR analysis to analyze ARGs pertinent to their research  
434 question(s) along with their associated MGEs.

435

436

437

438

439

440

441

442

443

## References

- 444 Antunes, P., Machado, J., Sousa, J.C., and Peixe, L. (2005) Dissemination of sulfonamide  
445 resistance genes (sul1, sul2, and sul3) in Portuguese *Salmonella enterica* strains and  
446 relation with integrons, *Antimicrob Agents Chemother* **49**: 836-839.
- 447 Aydin, S., Ince, B., Cetecioglu, Z., Arikan, O., Ozbayram, E.G., Shahi, A., and Ince, O.  
448 (2015) Combined effect of erythromycin, tetracycline and sulfamethoxazole on  
449 performance of anaerobic sequencing batch reactors, *Bioresource technology* **186**: 207-  
450 214.
- 451 Bouki, C., Venieri, D., and Diamadopoulos, E. (2013) Detection and fate of antibiotic  
452 resistant bacteria in wastewater treatment plants: a review, *Ecotoxicol Environ Saf* **91**: 1-  
453 9.
- 454 Carroll, A.C., and Wong, A. (2018) Plasmid persistence: costs, benefits, and the plasmid  
455 paradox, *Canadian Journal of Microbiology* **64**: 293-304.
- 456 Chen, S., and Smith, A.L. (2018) Methane-driven microbial fuel cells recover energy and  
457 mitigate dissolved methane emissions from anaerobic effluents, *Environmental Science:  
458 Water Research & Technology* **4**: 67-79.
- 459 Chioro, A., Coll-Seck, A.M., Hoie, B., Moeloek, N., Motsoaledi, A., Rajatanavin, R., and  
460 Touraine, M. (2015) Antimicrobial resistance: a priority for global health action, *Bull World  
461 Health Organ* **93**: 439.
- 462 Chu, B.T.T., Petrovich, M.L., Chaudhary, A., Wright, D., Murphy, B., Wells, G., and  
463 Poretsky, R. (2018) Metagenomics Reveals the Impact of Wastewater Treatment Plants  
464 on the Dispersal of Microorganisms and Genes in Aquatic Sediments, *Applied and  
465 Environmental Microbiology* **84**: e02168-02117.
- 466 Corno, G., Yang, Y., Eckert, E.M., Fontaneto, D., Fiorentino, A., Galafassi, S., et al. (2019)  
467 Effluents of wastewater treatment plants promote the rapid stabilization of the antibiotic  
468 resistome in receiving freshwater bodies, *Water Res* **158**: 72-81.
- 469 Crecchio, C., and Stotzky, G. (1998) Binding of DNA on humic acids: Effect on  
470 transformation of *Bacillus subtilis* and resistance to DNase, *Soil Biology and Biochemistry*  
471 **30**: 1061-1067.
- 472 Demanèche, S., Jocteur-Monrozier, L., Quiquampoix, H., and Simonet, P. (2001)  
473 Evaluation of biological and physical protection against nuclease degradation of clay-  
474 bound plasmid DNA, *Applied and environmental microbiology* **67**: 293-299.
- 475 Dominguez, M., Miranda, C.D., Fuentes, O., de la Fuente, M., Godoy, F.A., Bello-Toledo,  
476 H., and Gonzalez-Rocha, G. (2019) Occurrence of Transferable Integrons and sul and  
477 dfr Genes Among Sulfonamide-and/or Trimethoprim-Resistant Bacteria Isolated From  
478 Chilean Salmonid Farms, *Front Microbiol* **10**: 748.
- 479 Dong, P., Wang, H., Fang, T., Wang, Y., and Ye, Q. (2019) Assessment of extracellular  
480 antibiotic resistance genes (eARGs) in typical environmental samples and the  
481 transforming ability of eARG, *Environment International* **125**: 90-96.
- 482 Enne, V., M Bennett, P., Livermore, D., and Hall, L. (2004) *Enhancement of host fitness  
483 by the sul2-coding plasmid p9123 in the absence of selective pressure*, 958-963.
- 484 Fahrenfeld, N., Ma, Y., O'Brien, M., and Pruden, A. (2013) Reclaimed water as a reservoir  
485 of antibiotic resistance genes: distribution system and irrigation implications, *Front  
486 Microbiol* **4**: 130.

- 487 Federation, W.E.a.A. (2005) Standard methods for the examination of water and  
488 wastewater, *APHA*.
- 489 Frieden, T. (2013) Antibiotic Resistance Threats in the United States, 2013, *Brochure -*  
490 *US Centrs for Disease Control and Prevention*.
- 491 Garcillan-Barcia, M.P., Alvarado, A., and de la Cruz, F. (2011) Identification of bacterial  
492 plasmids based on mobility and plasmid population biology, *FEMS Microbiol Rev* **35**: 936-  
493 956.
- 494 Ghaly, T.M., and Gillings, M.R. (2018) Mobile DNAs as Ecologically and Evolutionarily  
495 Independent Units of Life.
- 496 Han, X.M., Hu, H.W., Shi, X.Z., Wang, J.T., Han, L.L., Chen, D., and He, J.Z. (2016)  
497 Impacts of reclaimed water irrigation on soil antibiotic resistome in urban parks of Victoria,  
498 Australia, *Environ Pollut* **211**: 48-57.
- 499 Hao, H., Shi, D.-y., Yang, D., Yang, Z.-w., Qiu, Z.-g., Liu, W.-l., et al. (2019) Profiling of  
500 intracellular and extracellular antibiotic resistance genes in tap water, *Journal of*  
501 *Hazardous Materials* **365**: 340-345.
- 502 Harb, M., Lou, E., Smith, A.L., and Stadler, L.B. (2019) Perspectives on the fate of  
503 micropollutants in mainstream anaerobic wastewater treatment, *Curr Opin Biotechnol* **57**:  
504 94-100.
- 505 Ibanez de Aldecoa, A.L., Zafra, O., and Gonzalez-Pastor, J.E. (2017) Mechanisms and  
506 Regulation of Extracellular DNA Release and Its Biological Roles in Microbial  
507 Communities, *Front Microbiol* **8**: 1390.
- 508 Kulkarni, P., Olson, N.D., Raspanti, G.A., Rosenberg Goldstein, R.E., Gibbs, S.G.,  
509 Sapkota, A., and Sapkota, A.R. (2017) Antibiotic Concentrations Decrease during  
510 Wastewater Treatment but Persist at Low Levels in Reclaimed Water, *Int J Environ Res*  
511 *Public Health* **14**: 668.
- 512 Le, T.H., Ng, C., Tran, N.H., Chen, H., and Gin, K.Y.H. (2018) Removal of antibiotic  
513 residues, antibiotic resistant bacteria and antibiotic resistance genes in municipal  
514 wastewater by membrane bioreactor systems, *Water Research* **145**: 498-508.
- 515 Lean, S.S., and Yeo, C.C. (2017) Small, Enigmatic Plasmids of the Nosocomial  
516 Pathogen, *Acinetobacter baumannii*: Good, Bad, Who Knows?, *Frontiers in Microbiology*  
517 **8**: 1547.
- 518 Li, B., Qiu, Y., Li, J., Liang, P., and Huang, X. (2019) Removal of antibiotic resistance  
519 genes in four full-scale membrane bioreactors, *Sci Total Environ* **653**: 112-119.
- 520 Li, Y.H., Lau, P.C., Lee, J.H., Ellen, R.P., and Cvitkovitch, D.G. (2001) Natural genetic  
521 transformation of *Streptococcus mutans* growing in biofilms, *J Bacteriol* **183**: 897-908.
- 522 Ma, Y., Wilson, C.A., Novak, J.T., Riffat, R., Aynur, S., Murthy, S., and Pruden, A. (2011)  
523 Effect of Various Sludge Digestion Conditions on Sulfonamide, Macrolide, and  
524 Tetracycline Resistance Genes and Class I Integrons, *Environmental Science &*  
525 *Technology* **45**: 7855-7861.
- 526 Mao, D., Luo, Y., Mathieu, J., Wang, Q., Feng, L., Mu, Q., et al. (2014) Persistence of  
527 extracellular DNA in river sediment facilitates antibiotic resistance gene propagation,  
528 *Environmental Science and Technology* **48**: 71-78.
- 529 McConnell, M.M., Truelstrup Hansen, L., Jamieson, R.C., Neudorf, K.D., Yost, C.K., and  
530 Tong, A. (2018) Removal of antibiotic resistance genes in two tertiary level municipal  
531 wastewater treatment plants, *Sci Total Environ* **643**: 292-300.

532 Michael, I., Rizzo, L., McArdell, C.S., Manaia, C.M., Merlin, C., Schwartz, T., et al. (2013)  
533 Urban wastewater treatment plants as hotspots for the release of antibiotics in the  
534 environment: A review. *Water Research*. 957-995.

535 Munir, M., Wong, K., and Xagorarakis, I. (2011) Release of antibiotic resistant bacteria and  
536 genes in the effluent and biosolids of five wastewater utilities in Michigan, *Water research*  
537 **45**: 681-693.

538 Nielsen, K.M., Johnsen, P.J., Bensasson, D., and Daffonchio, D. (2007) Release and  
539 persistence of extracellular DNA in the environment, *Environmental Biosafety Research*  
540 **6**: 37-53.

541 Okshevsky, M., and Meyer, R.L. (2015) The role of extracellular DNA in the  
542 establishment, maintenance and perpetuation of bacterial biofilms, *Crit Rev Microbiol* **41**:  
543 341-352.

544 O'Neil, J. (2014) AMR Review Paper - Tackling a crisis for the health and wealth of  
545 nations.

546 Pei, R., Kim, S.C., Carlson, K.H., and Pruden, A. (2006) Effect of river landscape on the  
547 sediment concentrations of antibiotics and corresponding antibiotic resistance genes  
548 (ARG), *Water Res* **40**: 2427-2435.

549 Phuong Hoa, P.T., Nonaka, L., Hung Viet, P., and Suzuki, S. (2008) Detection of the sul1,  
550 sul2, and sul3 genes in sulfonamide-resistant bacteria from wastewater and shrimp ponds  
551 of north Vietnam, *Sci Total Environ* **405**: 377-384.

552 Pruden, A., Larsson, D.G.J., Amézquita, A., Collignon, P., Brandt, K.K., Graham, D.W.,  
553 et al. (2013) Management options for reducing the release of antibiotics and antibiotic  
554 resistance genes to the environment, *Environmental health perspectives* **121**: 878-885.

555 Pruden, A., Pei, R., Storteboom, H., and Carlson, K.H. (2006) Antibiotic Resistance  
556 Genes as Emerging Contaminants: Studies in Northern Colorado, *Environmental*  
557 *Science & Technology* **40**: 7445-7450.

558 Prudhomme, M., Attaiech, L., Sanchez, G., Martin, B., and Claverys, J.-P. (2006)  
559 Antibiotic Stress Induces Genetic Transformability in the Human Pathogen *Streptococcus*  
560 *pneumoniae*, *Science* **313**: 89.

561 Quach-Cu, J., Herrera-Lynch, B., Marciniak, C., Adams, S., Simmerman, A., and Reinke,  
562 A.R. (2018) The Effect of Primary, Secondary, and Tertiary Wastewater Treatment  
563 Processes on Antibiotic Resistance Gene (ARG) Concentrations in Solid and Dissolved  
564 Wastewater Fractions, *Water* **10**: 37.

565 Rowe, W., Verner-Jeffreys, D.W., Baker-Austin, C., Ryan, J.J., Maskell, D.J., and Pearce,  
566 G.P. (2016) Comparative metagenomics reveals a diverse range of antimicrobial  
567 resistance genes in effluents entering a river catchment, *Water Sci Technol* **73**: 1541-  
568 1549.

569 San Millan, A., Escudero, J.A., Gutierrez, B., Hidalgo, L., Garcia, N., Llagostera, M., et al.  
570 (2009) Multiresistance in *Pasteurella multocida* is Mediated by Coexistence of Small  
571 Plasmids, *Antimicrobial Agents and Chemotherapy* **53**: 3399.

572 Shintani, M., Sanchez, Z.K., and Kimbara, K. (2015) Genomics of microbial plasmids:  
573 classification and identification based on replication and transfer systems and host  
574 taxonomy, *Frontiers in microbiology* **6**: 242-242.

575 Slager, J., Kjos, M., Attaiech, L., and Veening, J.W. (2014) Antibiotic-induced replication  
576 stress triggers bacterial competence by increasing gene dosage near the origin, *Cell* **157**:  
577 395-406.



- 578 Smith, A.L., Skerlos, S.J., and Raskin, L. (2013) Psychrophilic anaerobic membrane  
579 bioreactor treatment of domestic wastewater, *Water Research* **47**: 1655-1665.
- 580 Smith, A.L., Stadler, L.B., Love, N.G., Skerlos, S.J., and Raskin, L. (2012) Perspectives  
581 on anaerobic membrane bioreactor treatment of domestic wastewater: a critical review,  
582 *Bioresource Technology* **122**: 149-159.
- 583 Sugimoto, S., Sato, F., Miyakawa, R., Chiba, A., Onodera, S., Hori, S., and Mizunoe, Y.  
584 (2018) Broad impact of extracellular DNA on biofilm formation by clinically isolated  
585 Methicillin-resistant and -sensitive strains of *Staphylococcus aureus*, *Scientific Reports* **8**:  
586 2254.
- 587 Wang, D.N., Liu, L., Qiu, Z.G., Shen, Z.Q., Guo, X., Yang, D., et al. (2016) A new  
588 adsorption-elution technique for the concentration of aquatic extracellular antibiotic  
589 resistance genes from large volumes of water, *Water Res* **92**: 188-198.
- 590 Watve, M.M., Dahanukar, N., and Watve, M.G. (2010) Sociobiological Control of Plasmid  
591 Copy Number in Bacteria, *PLOS ONE* **5**: e9328.
- 592 Wu, S., Dalsgaard, A., Hammerum, A.M., Porsbo, L.J., and Jensen, L.B. (2010)  
593 Prevalence and characterization of plasmids carrying sulfonamide resistance genes  
594 among *Escherichia coli* from pigs, pig carcasses and human, *Acta veterinaria  
595 Scandinavica* **52**: 47-47.
- 596 Wu, S., Dalsgaard, A., Hammerum, A.M., Porsbo, L.J., and Jensen, L.B. (2010)  
597 Prevalence and characterization of plasmids carrying sulfonamide resistance genes  
598 among *Escherichia coli* from pigs, pig carcasses and human, *Acta Vet Scand* **52**: 47.
- 599 Xiong, Y., Harb, M., and Hong, P.Y. (2017) Performance and microbial community  
600 variations of anaerobic digesters under increasing tetracycline concentrations, *Applied  
601 Microbial Biotechnology* **101**: 5505-5517.
- 602 Xu, Y., Guo, C., Luo, Y., Lv, J., Zhang, Y., Lin, H., et al. (2016) Occurrence and distribution  
603 of antibiotics, antibiotic resistance genes in the urban rivers in Beijing, China,  
604 *Environmental Pollution* **213**: 833-840.
- 605 Zafra, O., Lamprecht-Grandío, M., de Figueras, C.G., and González-Pastor, J.E. (2012)  
606 Extracellular DNA Release by Undomesticated *Bacillus subtilis* Is Regulated by Early  
607 Competence, *PLOS ONE* **7**: e48716.
- 608 Zarei-Baygi, A., Harb, M., Wang, P., Stadler, L.B., and Smith, A.L. (2019) Evaluating  
609 Antibiotic Resistance Gene Correlations with Antibiotic Exposure Conditions in Anaerobic  
610 Membrane Bioreactors, *Environmental Science & Technology* **53**: 3599-3609.
- 611 Zhang, Y., Li, A., Dai, T., Li, F., Xie, H., Chen, L., and Wen, D. (2018) Cell-free DNA: A  
612 Neglected Source for Antibiotic Resistance Genes Spreading from WWTPs,  
613 *Environmental Science and Technology* **52**: 248-257.
- 614 Zheng, J., Su, C., Zhou, J., Xu, L., Qian, Y., and Chen, H. (2017) Effects and mechanisms  
615 of ultraviolet, chlorination, and ozone disinfection on antibiotic resistance genes in  
616 secondary effluents of municipal wastewater treatment plants, *Chemical Engineering  
617 Journal* **317**: 309-316.
- 618 Zhu, L., Zhang, Y., Fan, J., Herzberg, M.C., and Kreth, J. (2011) Characterization of  
619 competence and biofilm development of a *Streptococcus sanguinis* endocarditis isolate,  
620 *Mol Oral Microbiol* **26**: 117-126.
- 621

622

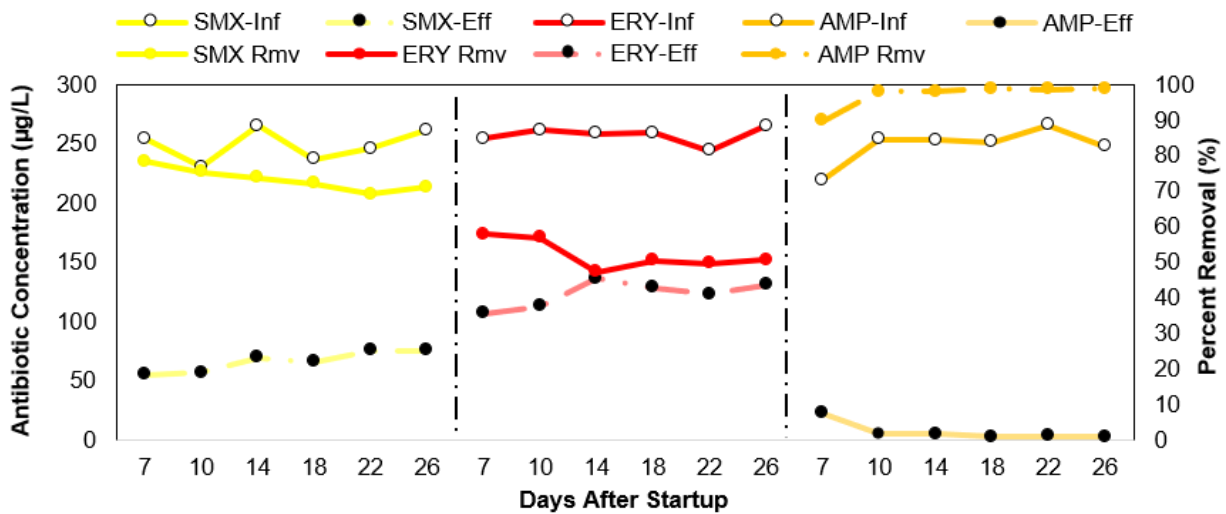

623

624 **Figure 1:** Measured antibiotic concentrations in the influent and effluent of AnMBR along  
 625 with antibiotic removal percentage. Antibiotics (ampicillin, erythromycin, and  
 626 sulfamethoxazole) were added to influent at a final concentration of 250 µg/L from day 3  
 627 to day 35.

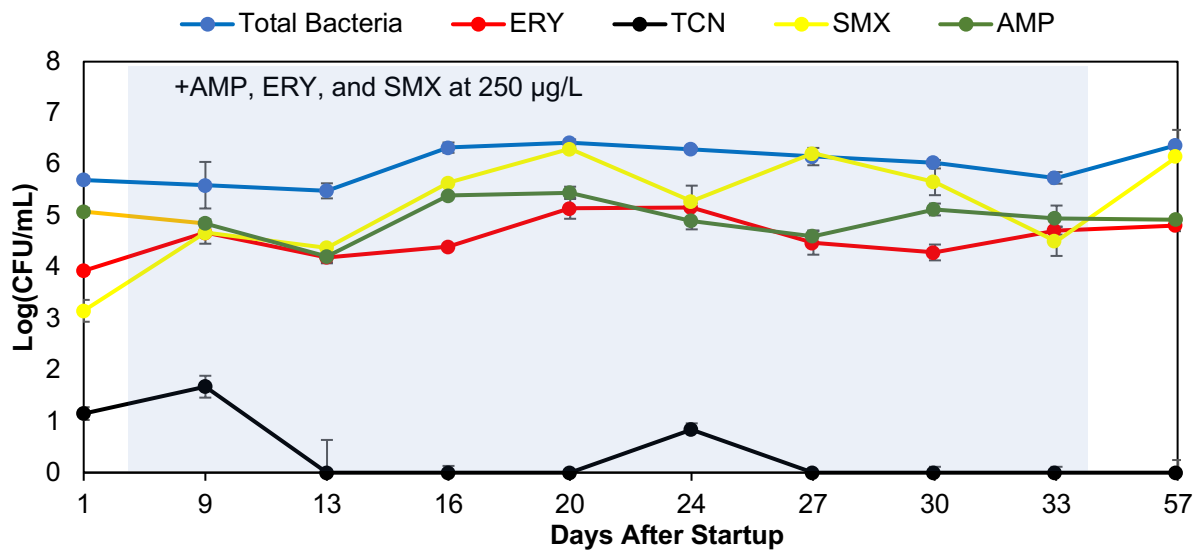

628

629 **Figure 2:** Heterotrophic plate count for effluent total bacteria, erythromycin resistant  
 630 bacteria (ERY), tetracycline resistance bacteria (TET), sulfamethoxazole resistant

631 bacteria (SMX), and ampicillin resistant bacteria (AMP) over the experimental run. All  
632 samples were plated in duplicate. The addition of antibiotics lasted from day 3 to day 35.

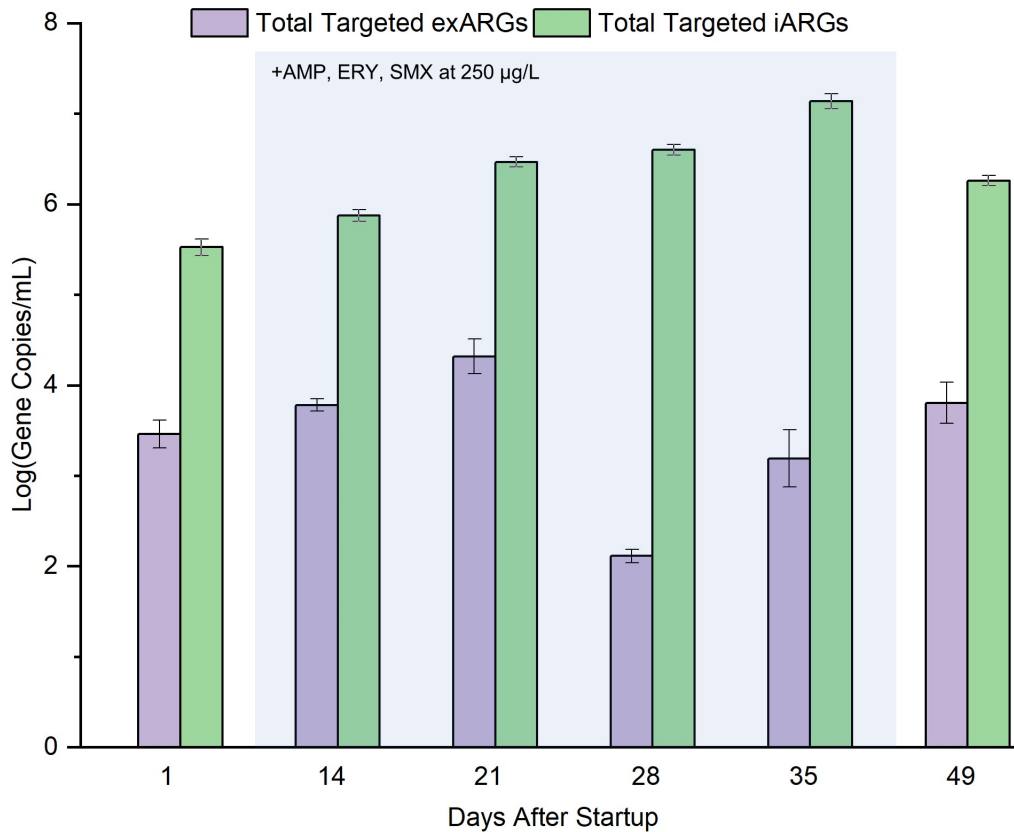

633

634 **Figure 3:** Abundance of total targeted intracellular and extracellular ARGs over the  
635 course of the experiment. Targeted ARGs consisting of *ampC*, *ermF*, *sul1*, *sul2*, *tetW*,  
636 *tetO*, and *oxa-1* were summed for each sampling date and plotted as log(Gene  
637 Copies/mL). The mixed antibiotics period lasted from day 3 to day 35.

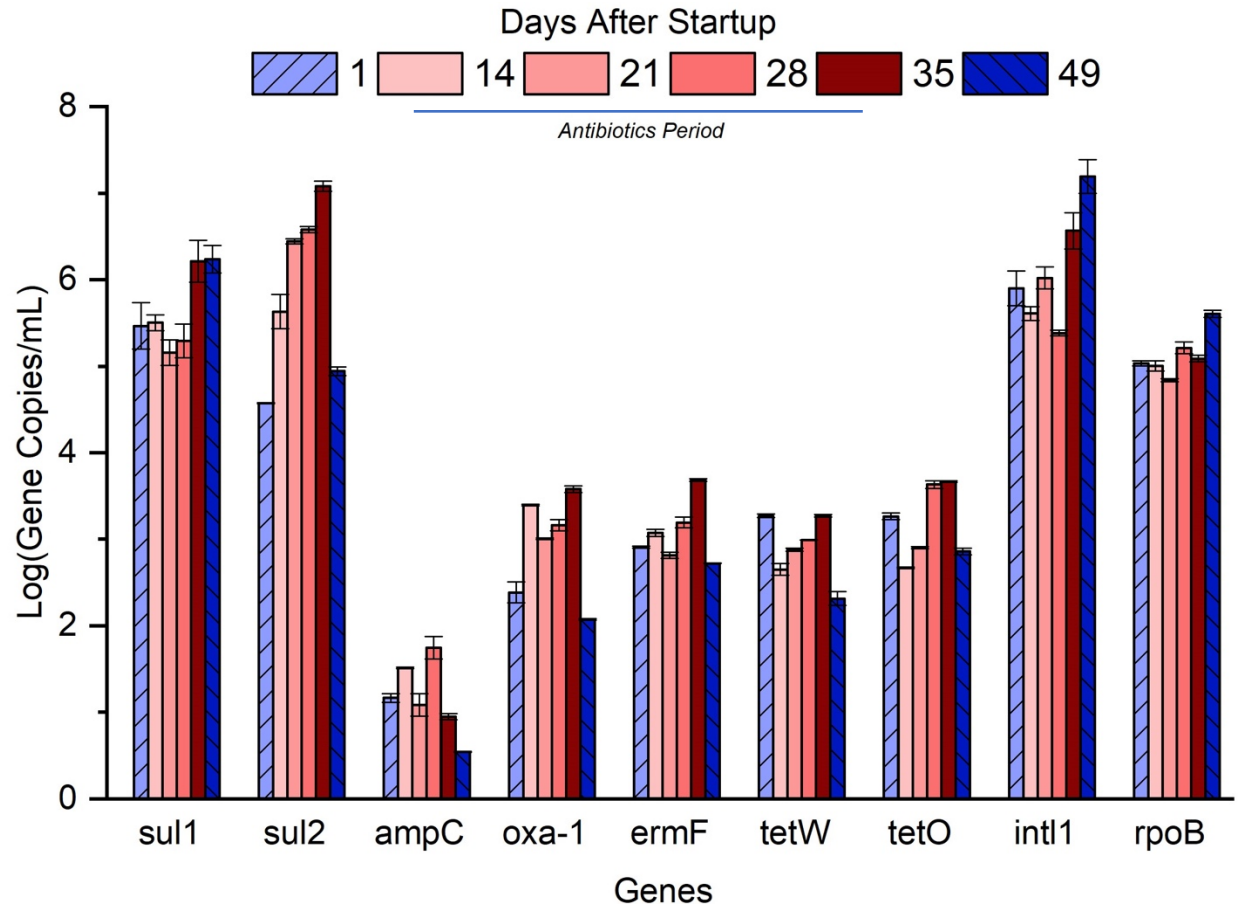

638

639 **Figure 4:** Abundance of targeted intracellular ARGs, *intl1*, and *rpoB* (Gene Copies/mL)  
640 in the AnMBR effluent. Error bars represent the mean value and standard deviations of  
641 triplicate qPCR runs for each sample. Antibiotics (ampicillin, erythromycin, and  
642 sulfamethoxazole) were added to influent at a final concentration of 250 µg/L from day 3  
643 to day 35.

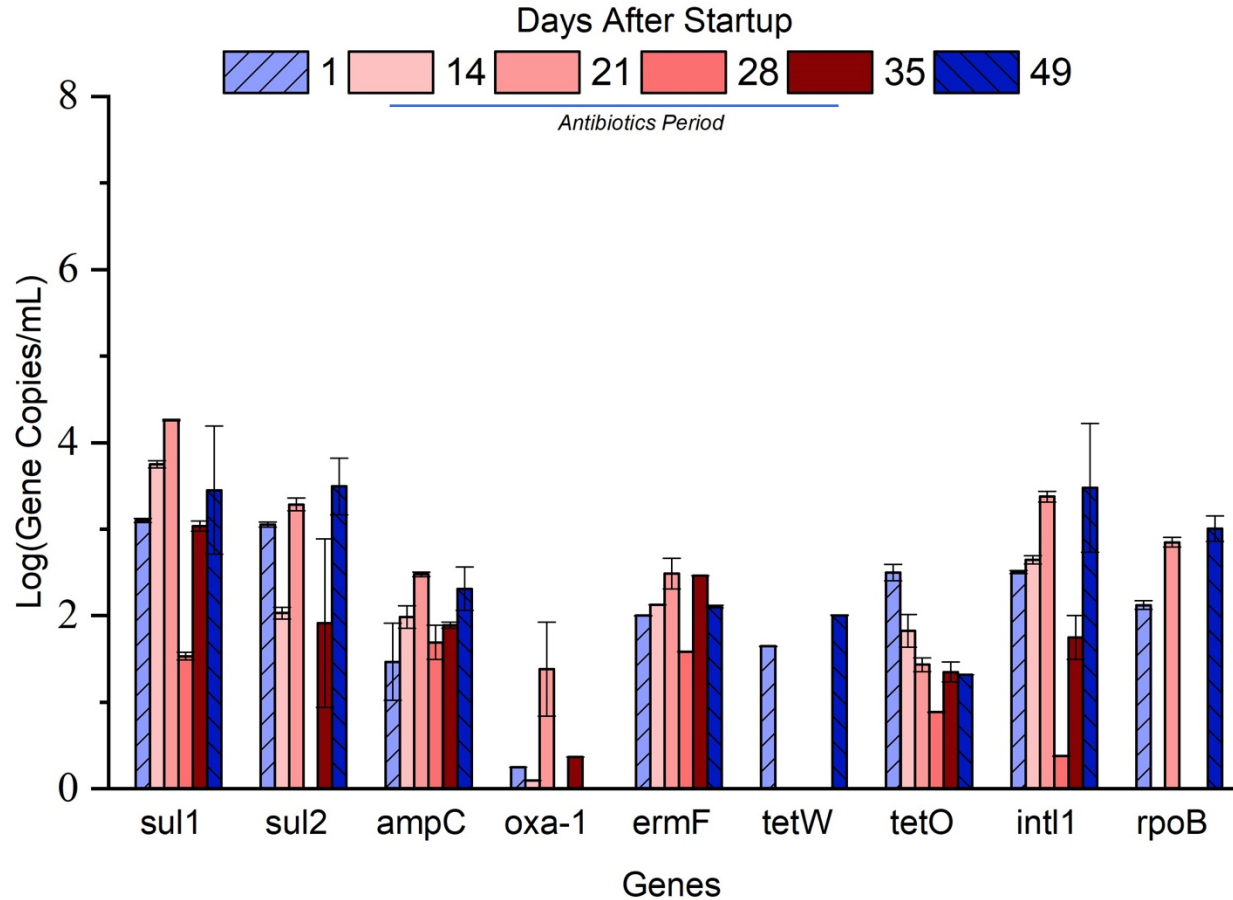

644

645 **Figure 5:** Abundance of targeted extracellular ARGs, *int11*, and *rpoB* log(Gene  
646 Copies/mL) in the AnMBR effluent during the course of the experimental run. Error bars  
647 represent the mean value and standard deviations of triplicate qPCR runs for each  
648 sample. Antibiotics (ampicillin, erythromycin, and sulfamethoxazole) were added to  
649 influent at a final concentration of 250  $\mu\text{g/L}$  from day 3 to day 35. Detection limit for each  
650 ARG are provided in (SI Table 2)

651

652

653

654

655

656

657  
658  
659  
660  
661  
662  
663  
664  
665  
666  
667  
668  
669  
670  
671  
672  
673  
674  
675  
676  
677  
678  
679  
680  
681  
682  
683  
684  
685  
686  
687  
688  
689

## Supporting Information

### Comparative analysis of intracellular and extracellular antibiotic resistance gene abundance in anaerobic membrane bioreactor effluent

Phillip Wang\*, Moustapha Harb\*, Ali Zarei-Baygi\*, Lauren B. Stadler\*\*, and Adam L. Smith\*†

\*Astani Department of Civil and Environmental Engineering, University of Southern California, 3620 S Vermont Ave, Los Angeles, CA 90089, USA

\*\* Department of Civil and Environmental Engineering, Rice University, 6100 Main Street, Houston, TX 77005, USA

†Corresponding author (Adam L. Smith)

Phone: +1 213.740.0473

Email: [smithada@usc.edu](mailto:smithada@usc.edu)

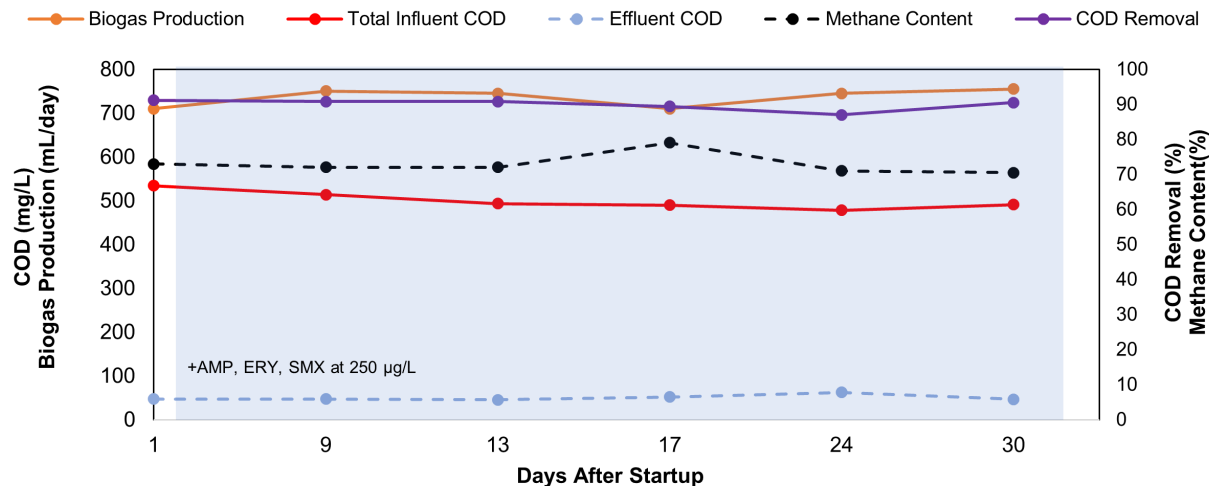

690

691 **SI Figure 1:** AnMBR performance for COD removal and biogas production during the  
692 addition of antibiotics. Biogas production, total COD and effluent COD concentrations are  
693 plotted on the primary y-axis. COD removal and methane content are plotted on the  
694 secondary y-axis. Antibiotics (ampicillin, erythromycin, and sulfamethoxazole) were  
695 added to influent at a final concentration of 250 µg/L from day 3 to day 35.

696

697

698

699

700

701

702

703

704

705

706

707 **Bench-scale anaerobic membrane bioreactor operation**

708 The bench-scale AnMBR contained 5 liters of sludge with a MLSS and MLVSS  $7.9 \pm 0.4$   
709 g/L and  $6.1 \pm 0.5$  g/L, respectively. The influent consisted of synthetic wastewater, which  
710 was prepared twice a week. The synthetic wastewater contains two components. A  
711 concentration solution and a dilution water. The concentrate solution and dilution water  
712 were combined at a ratio of 1:9 to achieve the final concentration for the feed. Table S1  
713 lists the components and final concentration for both solutions.

| Concentrate solution |                      | Dilution water      |                      |
|----------------------|----------------------|---------------------|----------------------|
| Composition          | Concentration (mg/L) | Composition         | Concentration (mg/L) |
| Ammonium Chloride    | 11.5                 | Sodium Bicarbonate  | 369                  |
| Calcium Chloride     | 11.5                 | Magnesium Phosphate | 30.8                 |
| Iron Sulfate         | 7.7                  | Potassium Phosphate | 13.8                 |
| Sodium Sulfate       | 11.5                 | Sodium hydroxide    | 18.5                 |
| Sodium Acetate       | 27                   |                     |                      |
| Urea                 | 87                   |                     |                      |
| Peptone              | 11.5                 |                     |                      |
| Yeast                | 46                   |                     |                      |
| Milk Powder          | 115.4                |                     |                      |
| Soy Oil              | 13.5                 |                     |                      |
| Hydrochloric acid    | 0.2                  |                     |                      |
| Starch               | 115.4                |                     |                      |
| Chromium Nitrate     | 3.7                  |                     |                      |
| Copper Chloride      | 2.5                  |                     |                      |
| Manganese Sulfate    | 4.9                  |                     |                      |
| Nickel Sulfate       | 1.2                  |                     |                      |
| Lead Chloride        | 0.5                  |                     |                      |
| Zinc Chloride        | 1.2                  |                     |                      |

714

715 **SI Table S1:** Synthetic wastewater composition

716 Membrane modules were physically cleaned and submerged in 0.5% (v/v) NaOCl  
717 solution overnight. In addition, a peristaltic pump was used to continuously circulate the  
718 0.5% NaOCl solution through the membranes. To return the permeate back to neutral pH,  
719 the membrane modules were pumped with DI water for 3 hours. During the DI water



720 pumping period, the permeate flux and transmembrane pressure (TMP) results did not  
721 indicate any signs of irreversible fouling throughout the experimental run.

722 A flowmeter (GFM17 Flow Meter, Aalborg, Orangeburg, NY) was used to measure  
723 the production of total biogas. The recirculation of headspace biogas through the sparging  
724 tubes underneath the membrane modules (rate = 30 ml/min) served to scour the surface  
725 of the membranes and prevent membrane fouling. The working volume of the reactor was  
726 maintained using an automatic level float switch. Effluent permeate flow was controlled  
727 at a rate of 8 min filtration and 2 min backwashing per 10 min period using a peristaltic  
728 pump (BT100-1L Multi-channel Peristaltic Pump, Longer, China). Pressure transducers  
729 measured the TMP of each membrane module. The permeate flux was set at 7 LMH,  
730 which led to hydraulic retention time (HRT) of 16 hours. No sludge was wasted except for  
731 sampling, which resulted in a solids retention time (SRT) of 300 days. The software  
732 LabVIEW 2014 (Student Edition) was used to monitor and record all relevant AnMBR  
733 operational parameters.

734 Chemical oxygen demand (COD) was measured in accordance with USEPA  
735 Method 410.4 using a HI801 Spectrophotometer (Hanna Instruments, Woonsocket, RI,  
736 USA). Volatile fatty acids (acetate, propionate, formate and valerate), sulfate, phosphate  
737 and chloride were measured by ion chromatography on an ICS 2100 (Thermo Fisher  
738 Scientific, Waltham, MA) using methods described previously (Chen and Smith, 2018).  
739 Headspace biogas samples and effluent were analyzed using a Trace 1310 GC system  
740 (Thermo Scientific, NY) with flame ionization detection (FID) as described previously  
741 (Chen and Smith, 2018).

| Gene         | Primers                                                              | Preincubation | Amplification                                       | Melting                                 | Amplification size (bp) | Detection limit (gene copy/mL) |
|--------------|----------------------------------------------------------------------|---------------|-----------------------------------------------------|-----------------------------------------|-------------------------|--------------------------------|
| <b>ermF</b>  | F- CGACACAGCTTTGGTTGAAC<br>R- GGACCTACCTCATAGACAAG                   | 95° for 900 s | 40 cycles, 95° for 30 s, 56° for 60 s, 70° for 60   | 95° for 10 s, 65° for 60 s, 97° for 1 s | 309                     | 350                            |
| <b>sul1</b>  | F- CGCACCGGAAACATCGCTGCAC<br>R- TGAAGTTCGCCGCAAGGCTCG                | 95° for 300 s | 40 cycles, 95° for 15 s, 58° for 30 s, 72° for 30 s | 95° for 10 s, 65° for 60 s, 97° for 1 s | 163                     | 155                            |
| <b>sul2</b>  | F- TCCGGTGGAGGCCGGTATCTGG<br>R- CGGGAATGCCATCTGCCTTGAG               | 95° for 900 s | 50 cycles, 95° for 15 s, 58° for 30 s, 72° for 30 s | 95° for 10 s, 65° for 60 s, 97° for 1 s | 191                     | 821                            |
| <b>intl1</b> | F- CTGGATTTTCGATCACGGCACG<br>R- ACATGCGTGTAATCATCGTCG                | 95° for 900 s | 45 cycles, 95° for 30 s, 60° for 60 s               | 95° for 10 s, 65° for 60 s, 97° for 1 s | 196                     | 159                            |
| <b>oxa-1</b> | F- TATCTACAGCAGCGCCAGTG<br>R- CGCATCAAATGCCATAAGTG                   | 94° for 180 s | 40 cycles, 94° for 30 s, 60° for 30 s, 72° for 60 s | N/A                                     | 199                     | 12100                          |
| <b>ampC</b>  | F- CCTCTTGCTCCACATTTGCT<br>R- ACAACGTTTGCTGTGTGACG                   | 95° for 300 s | 45 cycles, 95° for 45 s, 58° for 45 s, 72° for 60 s | 95° for 10 s, 65° for 60 s, 97° for 1 s | 189                     | 670                            |
| <b>tetO</b>  | F- ACGGARAGTTTATTGTATACC<br>R- TGCGTATCTATAATGTTGAC                  | 95° for 600 s | 40 cycles, 95° for 15 s, 50° for 30 s, 72° for 30 s | 95° for 10 s, 65° for 60 s, 97° for 1 s | 171                     | 2010                           |
| <b>tetW</b>  | F- GAGAGCCTGTATATGCCAGC<br>R- GGGCGTATCCACAATGTTAAC                  | 94° for 300 s | 40 cycles, 94° for 30 s, 64° for 30 s, 72° for 30 s | 95° for 10 s, 65° for 60 s, 97° for 1 s | 168                     | 1030                           |
| <b>rpoB</b>  | F- AACATCGGTTTGATCAAC<br>R- CGTTGCATGTTGGTACCCAT                     | 95° for 300 s | 40 cycles, 95° for 30 s, 55° for 30 s, 72° for 30 s | 95° for 10 s, 65° for 60 s, 97° for 1 s | 381                     | 5430                           |
| <b>pUC19</b> | M13 Forward (F)- TGATAAACGACGGCCAGT<br>L4440 (R)- AGCGAGTCAGTGAGCGAG | 95° for 300 s | 40 cycles, 95° for 30 s, 55° for 30 s, 72° for 30 s | 95° for 10 s, 65° for 60 s, 97° for 1 s | 335                     | 550                            |

742 **SI Table S2:** qPCR thermocycling conditions for all forward and reverse primers used in  
743 this study

744

745 **Antibiotic quantification**

746 All glassware used for antibiotic quantification were baked at 400 °C for a at least  
747 one hour and washed with methanol prior to use. Influent and effluent samples (10 mL)  
748 and standard solutions were filtered using a 0.2 µm PTFE syringe filters (Whatman) and  
749 a 10 mL syringe with Luer lock tip. Prepped samples were preserved in certified 2 mL  
750 amber LC vials (Agilent) and stored at 4 °C for no more than 3 days prior to analysis.  
751 Stock solutions of SMX and ERY were prepared in HPLC-grade methanol at  
752 concentrations of 20 mg/L and stored at -20 °C. AMP stock solution was prepared in  
753 HPLC-grade water at 20 mg/L because of its insolubility in methanol and stored at 4 °C.  
754 Five-point standard calibration curves were generated within the appropriate range for  
755 each of the incremental antibiotic influent concentration phases (i.e., 0.1-15 µg/L for 10  
756 µg/L, 0.5-70 µg/L for 50 µg/L, and 1-300 µg/L for 250 µg/L). All calibration curve R<sup>2</sup> values  
757 were > 99%. Both solvent-based and matrix-matched calibration curves were generated  
758 for all three compounds to ensure solvent based standards were representative of influent  
759 and effluent concentrations. Specifically, SMX, AMP, and ERY were dissolved in influent  
760 and effluent solutions at concentrations of 0.1, 1, 10, 100, and 1000 µg/L and processed  
761 using the same procedure employed to prepare reactor samples described above.  
762 Calibration curves of the results were plotted against standard solutions of the same  
763 concentrations dissolved in HPLC-grade water. For all three antibiotics, influent and  
764 effluent matrices showed equivalent concentrations and scaling at the ranges detected in  
765 the HPLC-grade water with R<sup>2</sup> values of > 99.9. %. No isotope-labelled internal standards  
766 were used because the samples were collected and then analyzed by direct injection LC-  
767 MS on the same (no solid phase extraction required).

768 SMX, ERY and AMP were all targeted using positive ESI MS-Q-TOF mode. The  
769 LC gradient program for detection of all three compounds utilized 0.1% formic acid in  
770 water as mobile phase A and acetonitrile as mobile phase B as follows: t=0.0 min A=90%  
771 B=10%, t=3.0 min A=0% B=100%, t=5.0 min A=0% B=100%, t=5.10 min A=90% B=10%.  
772 LC conditions used included a flow rate of 0.4 mL/min, maximum pressure of 600 bar,  
773 column temperature of 40 °C, and autosampler tray temperature of 8 °C. A post-column  
774 switch was used to divert the first 0.5 min of column elution to waste to avoid sending  
775 hydrophilic compounds from the effluent matrix through the MS. Injection volumes ranged  
776 from 0.5-10 µL, depending on the target sample range for each operational phase, to  
777 ensure that no compound extracted ion chromatogram peaks exceeded saturation  
778 detection values. MS conditions used were as follows: sheath gas temp. of 400 °C, sheath  
779 gas flow rate of 12 L/min, gas temperature of 225 °C, drying gas flow rate of 5 L/min,  
780 nebulizer pressure of 20 psi, capillary voltage of 3500V, nozzle voltage of 500V,  
781 acquisition rate of 1.5 spectra/s, and acquisition time of 667 ms/spectrum. Targeted  
782 compound acquisition parameters are provided in Table S2. All compound detection and  
783 quantification analyses were performed using the Agilent MassHunter Qualitative  
784 Analysis Navigator program.

785

786

787

| Compound         | Molecular Weight (MW) | Retention Time (min) | MS Spectrum (m/z) | Fragmentor Voltage (V) |
|------------------|-----------------------|----------------------|-------------------|------------------------|
| Sulfamethoxazole | 253.052               | 2.17                 | 254.059           | 400                    |
| Erythromycin     | 733.461               | 2.35                 | 734.469           | 100                    |
| Ampicillin       | 349.110               | 1.44                 | 350.117           | 400                    |

788

789 **SI Table S3.** Targeted antibiotic properties and MS data acquisition parameters

790

## 791 **Quantification of ARGs using real time qPCR**

792 All ARG standards used for qPCR quantification were constructed from PCR  
793 (Mastercycler nexus, Eppendorf, Hamburg, Germany) amplified products of DNA extracts  
794 from activated sludge (listed in Table S2). DNA samples from activated sludge. PCR  
795 products were analyzed on 2% agarose gel electrophoresis to verify the correct amplicon  
796 size. The correct DNA bands of interest were purified using Wizard® SV Gel and PCR  
797 Clean-Up System (Promega, Madison, WI). Purified amplicons were cloned into  
798 linearized pMiniT 2.0 vector and transformed into NEB 10-beta Competent *E. coli* using  
799 the NEB PCR Cloning Kit (New England Biolabs, Ipswich, MA). Transformed *E. coli* were  
800 selected for on AMP selection plates. AMP resistant *E. coli* cells were harvested, and its  
801 plasmids was extracted using PureLink™ Quick Plasmid Miniprep kit (Invitrogen,  
802 Carlsbad, CA). Plasmid extracts were sent for Sanger sequencing (Laragen Sequencing  
803 & Genotyping, Culver City, CA) to confirm the presence of target ARG.. DNA  
804 concentration of the plasmid extracts were measured using the Quant-iT PicoGreen  
805 dsDNA Assay Kit (Invitrogen, Carlsbad, CA). Standard curves were established using  
806 serial dilutions of the purified plasmids ( $10^{-1}$  to  $10^{-8}$ ). For all ARGs, the *int1* gene, and the  
807 *rpoB* gene, qPCR efficiencies ranged from 92% to 102%. Melting curve and gel  
808 electrophoresis were performed to assure the specificity of each qPCR reaction. SI Table  
809 2 shows the forward and reverse primers, annealing temperatures, and thermal cycling  
810 conditions of all ARGs, *int1* and *rpoB*..

811
